# Supplementary material for: Pathogenicity of Salmonella enterica in Caenorhabditis elegans Relies on Disseminated Oxidative Stress in the Infected Host
Source: PubMed Central journal article supplement (PMC3461013; doi:10.1371/journal.pone.0045417), 2012-09-28
Supplement: pone.0045417.s001.pdf [file pone.0045417.s001.pdf]

**Table S1. List of nematode and bacteria strains used in this study**

| Strain                  |                    | Genotype or description                                                                                       | Source or reference  |
|-------------------------|--------------------|---------------------------------------------------------------------------------------------------------------|----------------------|
| <b>Nematode</b>         |                    |                                                                                                               |                      |
| <i>C. elegans</i>       | N2                 | Wild-type variant Bristol                                                                                     | CGC <sup>a</sup>     |
|                         | SU159              | <i>ajm-1(ok160) X; jcEx44 [pJS191 (<i>ajm-1::gfp</i>) + pRF4 (<i>rol-6(su1006)</i>)]</i>                      | CGC <sup>a</sup>     |
| <b>Bacteria</b>         |                    |                                                                                                               |                      |
| <i>S. Typhimurium</i>   | ATCC 14028         | Wild-type 14028 strain                                                                                        | ATCC <sup>b</sup>    |
|                         | ATCC 14028::GFP    | Wild-type 14028 <i>proU::gfp</i> , chloramphenicol <sup>r</sup>                                               | MR Lab, [1]          |
|                         | ATCC 14028::RFP    | Wild-type 14028 + pMW635, <i>araC</i> , ampicillin <sup>r</sup>                                               | MR Lab, Oliver Pabst |
|                         | <i>hilA</i>        | ATCC 14028 <i>hilA</i> , kanamycin <sup>r</sup>                                                               | [2]                  |
|                         | <i>ssaV</i>        | ATCC 14028 non-polar <i>ssaV</i> , chloramphenicol <sup>r</sup>                                               | [3]                  |
|                         | <i>rfaL</i>        | ATCC 14028 <i>rfaL</i> , chloramphenicol <sup>r</sup>                                                         | [4]                  |
|                         | <i>trxA</i>        | ATCC 14028 non-polar <i>trxA</i>                                                                              | [4]                  |
|                         | <i>trxA/pFA3</i>   | <i>trxA</i> + wild-type TrxA, E <sub>o</sub> <sup>r</sup> -270 mV, <i>araC</i> , chloramphenicol <sup>r</sup> | [4,5]                |
|                         | <i>trxA/pFA5</i>   | <i>trxA</i> + Grx-type TrxA, E <sub>o</sub> <sup>r</sup> -195 mV, <i>araC</i> , chloramphenicol <sup>r</sup>  | [4,5]                |
|                         | <i>trxA/pFA6</i>   | <i>trxA</i> + DsbA-type TrxA, E <sub>o</sub> <sup>r</sup> -204mV, <i>araC</i> , chloramphenicol <sup>r</sup>  | [4,5]                |
|                         | <i>trxA/pFA7</i>   | <i>trxA</i> + PDI-type TrxA, E <sub>o</sub> <sup>r</sup> -221 mV, <i>araC</i> , chloramphenicol <sup>r</sup>  | [4,5]                |
|                         | <i>trxA/pFA8</i>   | <i>trxA</i> + non-catalytic TrxA, <i>araC</i> , chloramphenicol <sup>r</sup>                                  | [4,5]                |
|                         | <i>trxA/pBAD33</i> | <i>trxA</i> + empty vector, <i>araC</i> , chloramphenicol <sup>r</sup>                                        | [4,5]                |
|                         | <i>trxB</i>        | ATCC 14028 <i>trxB</i> , kanamycin <sup>r</sup>                                                               | [4]                  |
|                         | <i>trxC</i>        | ATCC 14028 <i>trxC</i> , kanamycin <sup>r</sup>                                                               | [4]                  |
|                         | <i>dsbC</i>        | ATCC 14028 <i>dsbC</i> , kanamycin <sup>r</sup>                                                               | [4]                  |
| <i>S. Dublin</i>        | STM75              | Wild-type STM75 strain                                                                                        | [6]                  |
|                         | STM75::RFP         | Wild-type STM75 + pMW635, <i>araC</i> , ampicillin <sup>r</sup>                                               | MR Lab, Oliver Pabst |
| <i>E. coli</i>          | OP50               | Laboratory food source                                                                                        | CGC <sup>a</sup>     |
|                         | OP50::GFP          | OP50 + pFVP25.1, ampicillin <sup>r</sup>                                                                      | CGC <sup>a</sup>     |
| <i>B. thailandensis</i> | ATCC 700388        | Wild-type reference strain isolated from Thailand                                                             | ATCC <sup>b</sup>    |

<sup>a</sup> Caenorhabditis Genetics Center, University of Minnesota, Minneapolis, U.S.A.<sup>b</sup> American Type Cell Collection, Virginia, U.S.A.

## REFERENCES

1. Hautefort I, Proença MJ, Hinton JCD (2003) Single-copy green fluorescent protein gene fusions allow accurate measurement of *Salmonella* gene expression in vitro and during infection of mammalian cells. *Appl Environ Microbiol* 69: 7480-7491.
2. Negrea A, Bjur E, Ygberg SE, Elofsson M, Wolf-Watz H, et al. (2007) Salicylidene acylhydrazides that affect type III protein secretion in *Salmonella enterica* serovar Typhimurium. *Antimicrob Agents Chemother* 51: 2867-2876.
3. Shea JE, Beuzon CR, Gleeson C, Mundy R, Holden DW (1999) Influence of the *Salmonella* Typhimurium pathogenicity island 2 type III secretion system on bacterial growth in the mouse. *Infect Immun* 67: 213-219.
4. Bjur E, Eriksson-Ygberg S, Aslund F, Rhen M (2006) Thioredoxin 1 promotes intracellular replication and virulence of *Salmonella enterica* serovar Typhimurium. *Infect Immun* 74: 5140-5151.
5. Mössner E, Huber-Wunderlich M, Rietsch A, Beckwith J, Glockshuber R, et al. (1999) Importance of redox potential for the *in vivo* function of the cytoplasmic disulfide reductant thioredoxin from *Escherichia coli*. *J Biol Chem* 274.
6. Tezcan-Merdol D, Eriksson Ygberg S, Rhen M (2007) The *Salmonella enterica* virulence plasmid and the spv gene cluster. In: Rhen M, Maskell D, Mastroeni P, Therfall J, editors. *Salmonella: molecular biology and pathogenesis*. Norfolk: Horizon Bioscience. pp. 89-103.
